# Supplementary material for: Effects of Intraoperative Dexmedetomidine Infusion on Postoperative Pain after Craniotomy: A Narrative Review
Source: MDPI journal article supplement (doi:10.3390/brainsci11121636), 2021-12-11
Supplement: s1 [file s1]

**Suppl table S1** GRADE evidence profile of the included trials

| References              | Participants | Risk of bias                      | Inconsistency                    | Indirectness                              | Imprecision                              | Publication bias               | Quality of evidence |
|-------------------------|--------------|-----------------------------------|----------------------------------|-------------------------------------------|------------------------------------------|--------------------------------|---------------------|
| Bekker et al. [16]      | 56           | No serious risk of bias           | No serious risk of inconsistency | No serious risk of indirectness           | No serious risk of imprecision           | Undetected                     | <b>HIGH</b>         |
| Peng et al. [7]         | 76           | No serious risk of bias           | No serious risk of inconsistency | No serious risk of indirectness           | No serious risk of imprecision           | Undetected                     | <b>HIGH</b>         |
| Rajan et al. [17]       | 139          | No serious risk of bias           | No serious risk of inconsistency | No serious risk of indirectness           | No serious risk of imprecision           | Undetected                     | <b>HIGH</b>         |
| Song et al. [18]        | 52           | Serious risk of bias*             | No serious risk of inconsistency | No serious risk of indirectness           | Serious risk of imprecision*             | Undetected                     | <b>MODERATE</b>     |
| Sriganesh et al. [2]    | 24           | No serious risk of bias           | No serious risk of inconsistency | No serious risk of indirectness           | No serious risk of imprecision           | Undetected                     | <b>HIGH</b>         |
| Turgut et al. [19]      | 50           | Serious risk of bias*             | No serious risk of inconsistency | No serious risk of indirectness           | Serious risk of imprecision*             | Undetected                     | <b>MODERATE</b>     |
| Yun et al. [20]         | 134          | No serious risk of bias           | No serious risk of inconsistency | No serious risk of indirectness           | No serious risk of imprecision           | Undetected                     | <b>HIGH</b>         |
| Goettel et al. [21]     | 50           | Serious risk of bias*             | No serious risk of inconsistency | No serious risk of indirectness           | Serious risk of imprecision*             | Undetected                     | <b>MODERATE</b>     |
| Tanskanen et al. [22]   | 53           | No serious risk of bias           | No serious risk of inconsistency | No serious risk of indirectness           | No serious risk of imprecision           | Undetected                     | <b>HGH</b>          |
| Günes et al. [23]       | 78           | Serious risk of bias <sup>†</sup> | No serious risk of inconsistency | Serious risk of indirectness <sup>‡</sup> | Serious risk of imprecision <sup>‡</sup> | Undetected                     | <b>LOW</b>          |
| Kim et al. [24]         | 64           | No serious risk of bias           | No serious risk of inconsistency | No serious risk of indirectness           | No serious risk of imprecision           | Undetected                     | <b>HIGH</b>         |
| Zheng et al. [25]       | 66           | No serious risk of bias           | No serious risk of inconsistency | No serious risk of indirectness           | No serious risk of imprecision           | Undetected                     | <b>HIGH</b>         |
| Prathapadas et al. [26] | 40           | No serious risk of bias           | No serious risk of inconsistency | No serious risk of indirectness           | No serious risk of imprecision           | No serious risk of imprecision | <b>HIGH</b>         |

\* Quality was rated down for risk of bias due to imprecision and inadequately generated randomization sequence and inadequate information about allocation concealment and blinding

<sup>†</sup> Quality was rated down for risk of bias due to being a retrospective study

<sup>‡</sup> Quality was rated down for risk of bias due to completely missing information about the randomization sequence and inadequate information about allocation concealment and blinding
