# Supplementary material for: Effects of Intraoperative Dexmedetomidine Infusion on Postoperative Pain after Craniotomy: A Narrative Review
Source: MDPI journal article supplement (doi:10.3390/brainsci11121636), 2021-12-11
Supplement: s1 [file s1]

## Supplementary File

### Search String

Ovid Technologies

-----

Search for: 3 and 7 and 11

Results: 185

Database: Ovid MEDLINE(R) and Epub Ahead of Print, In-Process & Other Non-Indexed Citations, Daily and Versions(R) <1946 to October 13, 2021>

Search Strategy:

-----

- 1 Dexmedetomidine/ (3099)
- 2 Dexmedetomidine.mp. (5253)
- 3 1 or 2 (5253)
- 4 Intraoperative Care/ (16326)
- 5 Intraoperative Period/ (13658)
- 6 (intraoperative or intra-operative or peroperative or per-operative).ti,ab,kw. (125692)
- 7 4 or 5 or 6 (139083)
- 8 Neurosurgery/ (14431)
- 9 exp Neurosurgical Procedures/ (184443)
- 10 (neurosurg\* or neuro-surg\*).ti,ab,kw. (48007)
- 11 8 or 9 or 10 (222118)
- 12 3 and 7 and 11 (185)
